# Supplementary material
Source: PubMed Central journal article supplement (PMC5542450)
Supplement: NIHMS889136-supplement-Supporting_Information.pdf [file NIHMS889136-supplement-Supporting_Information.pdf]

# Supporting Information

## Cooperative RNA Folding Under Cellular Conditions Arises From Both Tertiary Structure Stabilization and Secondary Structure Destabilization

*Kathleen A. Leamy*<sup>1,2</sup>, *Neela H. Yennawar*<sup>3</sup>, *Philip C. Bevilacqua*<sup>\*1,2,4</sup>

<sup>1</sup>Department of Chemistry, Pennsylvania State University, University Park, PA, 16802, U.S.A.

<sup>2</sup>Center for RNA Molecular Biology, Pennsylvania State University, University Park, PA, 16802,  
U.S.A

<sup>3</sup>Huck Institutes of the Life Sciences, The Pennsylvania State University, University Park, PA,  
16802, U.S.A

<sup>4</sup>Department of Biochemistry and Molecular Biology, Pennsylvania State University, University  
Park, PA, 16802, U.S.A.

\*Corresponding Author.

104 Chemistry Building, University Park, PA 16802

Phone: 814-863-3812,

e-mail: pcb5@psu.edu

**Table S1.** Melting temperatures of T7 tRNA<sup>phe</sup>, its individual HF, and the SSS in the background of 0 mM Mg<sup>2+</sup> derived from optical melting.

| Melting Temperature (°C) in 0 mM Mg <sup>2+</sup> |                           |               |      |              |        |           |
|---------------------------------------------------|---------------------------|---------------|------|--------------|--------|-----------|
| Additive                                          | FL T7 tRNA <sup>phe</sup> | Acceptor Stem | D SL | Anticodon SL | TΨC SL | Sum of SS |
| None                                              | 53.2                      | 56.8          | 60.5 | 63.0         | 58.3   | 59.6      |
| 20% PEG200                                        | 52.8                      | 52.9          | 58.8 | 61.7         | 53.4   | 55.6      |
| 40% PEG200                                        | 50.5                      | 45.5          | 44.0 | 60.0         | 44.0   | 48.4      |
| 20% PEG4000                                       | 45.5                      | 57.8          | 64.9 | 66.7         | 56.8   | 61.3      |
| 40% PEG4000                                       | 64.0                      | 59.3          | 64.6 | 67.6         | 60.0   | 62.2      |
| 20% PEG8000                                       | 66.0                      | 68.1          | 69.0 | 72.5         | 72.4   | 70.4      |
| 40% PEG8000                                       | 54.0                      | 57.0          | 51.0 | 68.8         | 60.5   | 58.9      |
| 20% PEG20000                                      | --                        | 60.5          | 61.5 | 57.0         | 57.0   | 57.0      |

All samples contain a background of 10 mM sodium cacodylate (pH 7.0) and 140 mM KCl.

**Table S2.** Melting temperatures of T7 tRNA<sup>phe</sup>, its individual HF, and the SSS in the background of 0.5 mM Mg<sup>2+</sup> derived from optical melting.

| Melting Temperature (°C) in 0.5 mM Mg <sup>2+</sup> |                           |               |                      |              |        |           |
|-----------------------------------------------------|---------------------------|---------------|----------------------|--------------|--------|-----------|
| Additive                                            | FL T7 tRNA <sup>phe</sup> | Acceptor Stem | D SL                 | Anticodon SL | TΨC SL | Sum of SS |
| None                                                | 57.8                      | 57.1          | (1) 60.5<br>(2) 67.8 | 67.8         | 59.6   | 63.4      |
| 20% PEG200                                          | 57.0                      | 52.3          | 63.5                 | 63.5         | 55.3   | 56.4      |
| 40% PEG200                                          | 59.1                      | 44.6          | 51.5                 | 55.6         | 50.3   | 49.3      |
| 20% PEG4000                                         | 63.0                      | 57.7          | 78.0                 | 67.1         | 57.2   | 58.2      |
| 40% PEG4000                                         | 65.5                      | 59.3          | 64.6                 | 67.7         | 61.0   | 62.3      |
| 20% PEG8000                                         | 64.0                      | 59.0          | 55.1                 | 67.6         | 57.4   | 58.4      |
| 40% PEG8000                                         | 66.0                      | 57.2          | 54.2                 | 66.7         | 53.6   | 57.7      |
| 20% PEG20000                                        | 64.0                      | 58.5          | --                   | 62.0         | 58.5   | 58.5      |

All samples contain a background of 10 mM sodium cacodylate (pH 7.0) and 140 mM KCl.

**Table S3.** Melting temperatures of T7 tRNA<sup>phe</sup>, its individual HF, and the SSS in the background of 2.0 mM Mg<sup>2+</sup> derived from optical melting.

| <b>Melting Temperature (°C) in 2.0 mM Mg<sup>2+</sup></b> |                                     |                          |             |                         |               |                  |
|-----------------------------------------------------------|-------------------------------------|--------------------------|-------------|-------------------------|---------------|------------------|
| <b>Additive</b>                                           | <b>FL T7<br/>tRNA<sup>phe</sup></b> | <b>Acceptor<br/>Stem</b> | <b>D SL</b> | <b>Anticodon<br/>SL</b> | <b>TΨC SL</b> | <b>Sum of SS</b> |
| <b>None</b>                                               | 65.1                                | 59.7                     | 66.5        | 69.7                    | 62.0          | 63.4             |
| <b>20% PEG200</b>                                         | 64.8                                | 55.8                     | 61.6        | 66.1                    | 58.2          | 59.3             |
| <b>40% PEG200</b>                                         | 64.1                                | 50.4                     | 58.4        | 54.6                    | 61.4          | 51.9             |
| <b>20% PEG4000</b>                                        | 69.5                                | 59.3                     | 64.6        | 67.6                    | 61.9          | 62.3             |
| <b>40% PEG4000</b>                                        | 87.5                                | 58.0                     | 52.5        | 67.6                    | 61.0          | 62.3             |
| <b>20% PEG8000</b>                                        | 69.0                                | 59.8                     | 62.7        | 70.1                    | 61.1          | 64.3             |
| <b>40% PEG8000</b>                                        | 64.0                                | 57.6                     | 59.5        | 66.5                    | 61.0          | 60.6             |
| <b>20% PEG20000</b>                                       | 70.0                                | 58.0                     | --          | 69.0                    | 58.5          | 62.5             |

All samples contain a background of 10 mM sodium cacodylate (pH 7.0) and 140 mM KCl.

**Table S4.** Evaluation of SAXS data fitting using FoXS and Supcomb.

| <b>SAXS Sample</b>                         | <b>RMSD (Å)</b> |
|--------------------------------------------|-----------------|
| <b>Buffer with 0 mM Mg<sup>2+</sup></b>    | 6.56            |
| <b>Buffer with 0.5 mM Mg<sup>2+</sup></b>  | 4.13            |
| <b>Buffer with 2.0 mM Mg<sup>2+</sup></b>  | 3.30            |
| <b>20% PEG with 0.5 mM Mg<sup>2+</sup></b> | 3.55            |
| <b>20% PEG with 2.0 mM Mg<sup>2+</sup></b> | 2.75            |

The RMSD was found using the SUPCOMB alignments of the DAMAVER envelopes to the tRNA crystal structure.

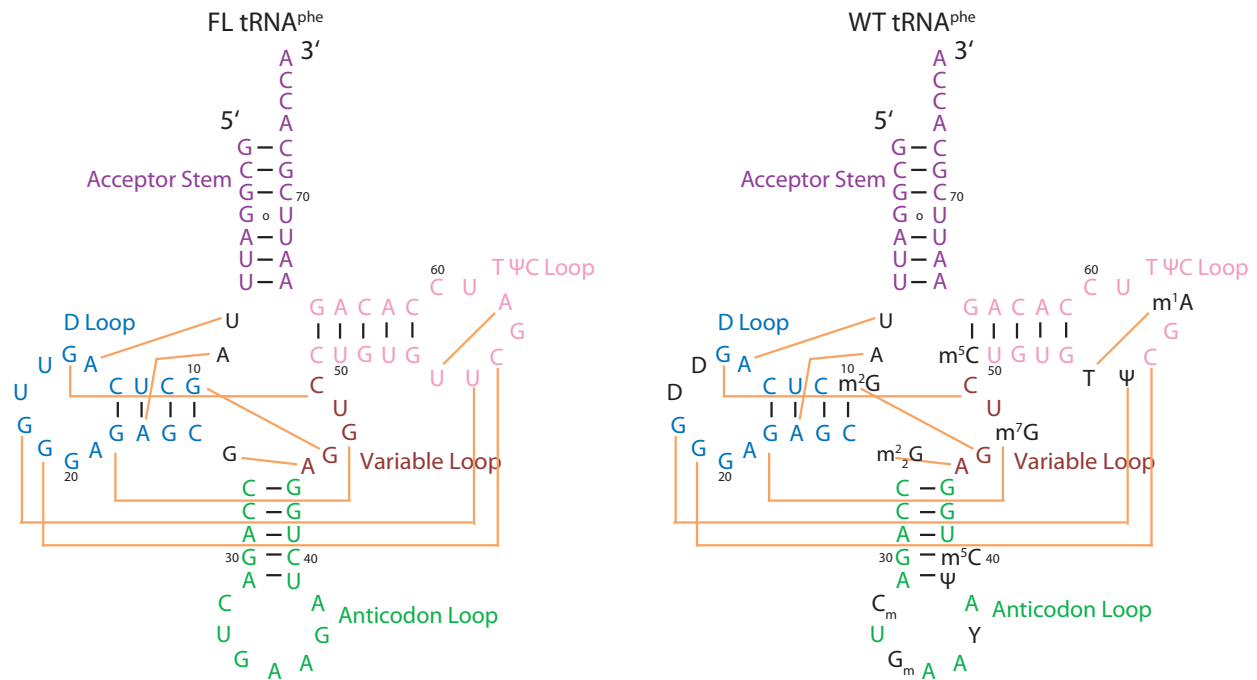

**Figure S1.** Secondary and tertiary structures of FL tRNA<sup>phe</sup> and WT tRNA<sup>phe</sup>. Tertiary contacts, yellow lines, are superimposed on (*left*) FL tRNA<sup>phe</sup> and (*right*) WT tRNA<sup>phe</sup>, which contains modifications (black bases). Coloring as per Figure 1.

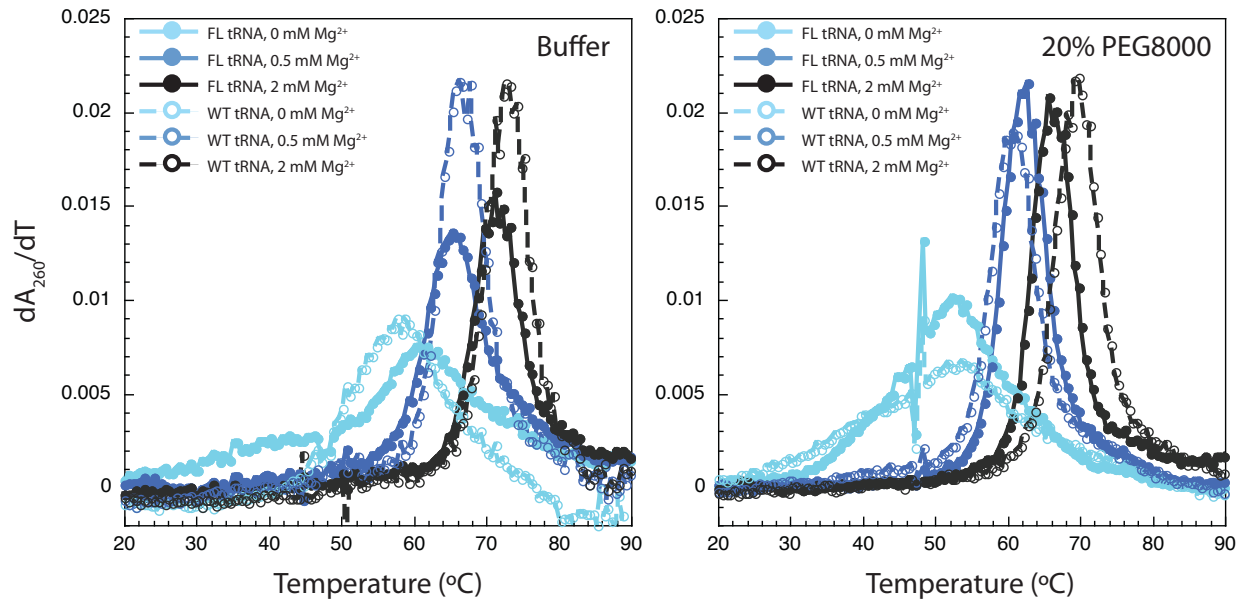

**Figure S2.** FL transcribed tRNA and WT tRNA behave in a similar manner in buffer and crowded conditions. In (*left*) buffer and (*right*) 20% PEG8000 FL tRNA (closed circles) and WT modified tRNA (open circles) have similar folding transitions at physiological concentrations of  $Mg^{2+}$ .

# 0.5 mM Mg<sup>2+</sup>

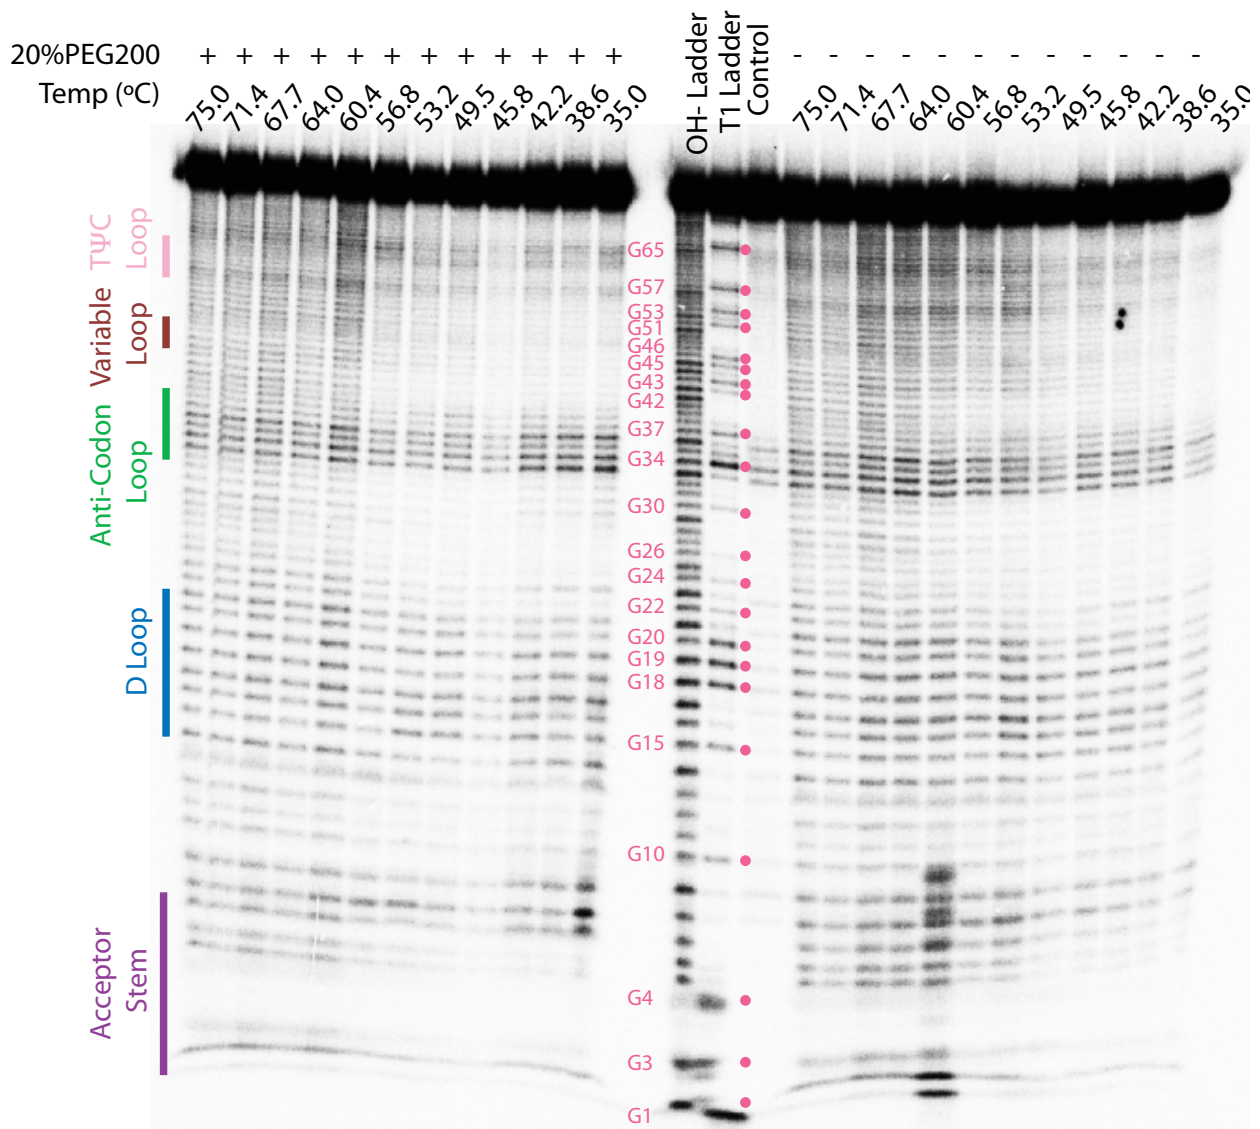

**Figure S3.** Temperature-dependent in-line probing (dT-ILP) PAGE gel of FL tRNA<sup>Phe</sup> in buffer and 20% PEG200 with a background of 10 mM sodium cacodylate, 140 mM KCl, and 0.5 mM Mg<sup>2+</sup>. Guanosines on the T1 ladder are marked with a pink dot, and the regions of the gel that contain nucleotides in the 3' of the acceptor stem, the D loop, anticodon loop, variable loop, and TΨC loop are noted. The colors of those regions match the colors in Fig. 1. At 35.0 °C, 38.6 °C, and 42.2 °C the 36 h time point was analyzed; at 45.8 °C, 49.5 °C, and 53.2 °C the 24 h time point was analyzed; at 56.8 °C and 60.4 °C the 5 h time point was analyzed; at 64.0 °C and 67.7 °C the 3 h time point was analyzed; and at 71.4 °C and 75.0 °C the 1 h time point was analyzed.

## 2.0 mM Mg<sup>2+</sup>

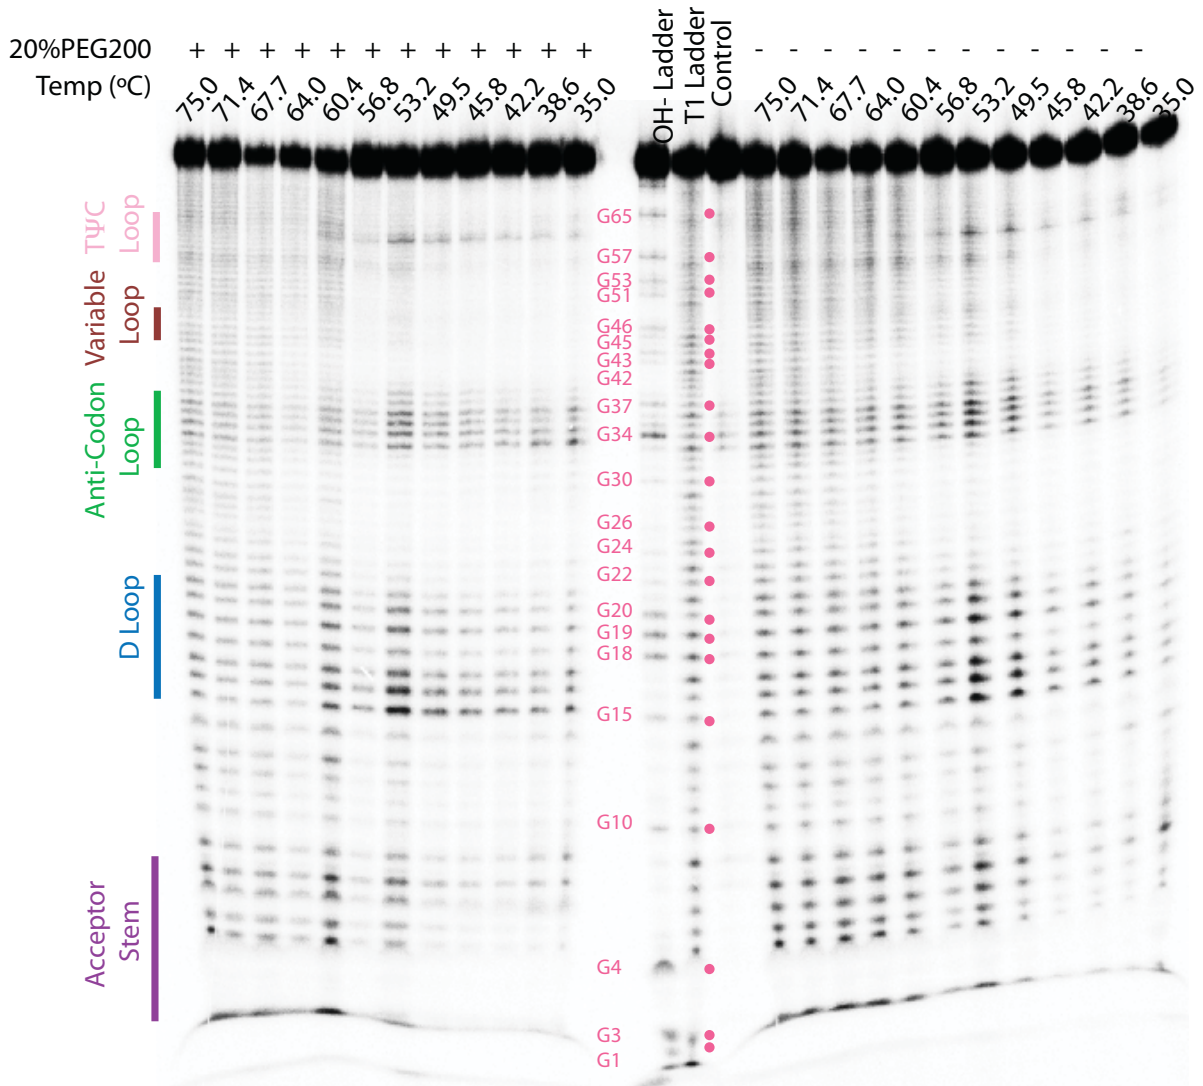

**Figure S4.** Temperature-dependent in-line probing (dT-ILP) PAGE gels of FL tRNA<sup>phe</sup> in buffer and 20% PEG200 with a background of 10 mM sodium cacodylate, 140 mM KCl, and 2.0 mM Mg<sup>2+</sup>. Guanosines on the T1 ladder are marked with a pink dot, and the regions of the gel that contain nucleotides in the 3' of the acceptor stem, the D loop, anticodon loop, variable loop, and TΨC loop are noted. The colors of those regions match the colors in Fig. 1. At 35.0 °C, 38.6 °C, and 42.2 °C the 36 h time point was analyzed; at 45.8 °C, 49.5 °C, and 53.2 °C the 24 h time point was analyzed; at 56.8 °C and 60.4 °C the 5 h time point was analyzed; at 64.0 °C and 67.7 °C the 3 h time point was analyzed; and at 71.4 °C and 75.0 °C the 1 h time point was analyzed.

## 2.0 mM Mg<sup>2+</sup>

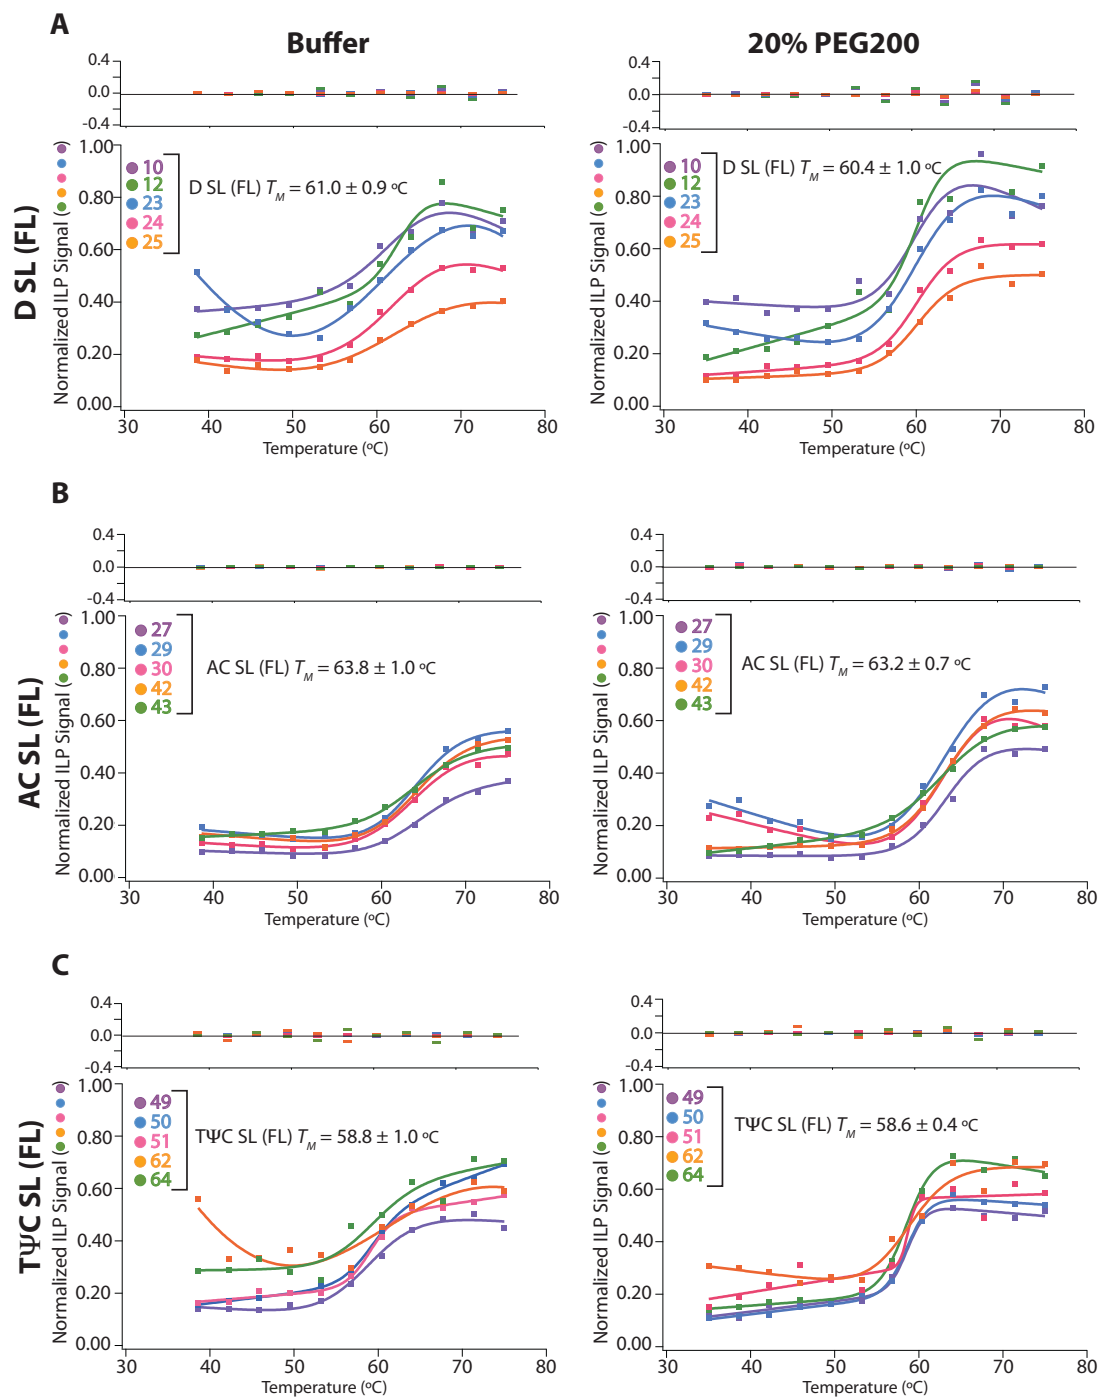

**Figure S5.** Helical stem fitting of temperature-dependent ILP data in buffer and 20% PEG200 2.0 mM Mg<sup>2+</sup>. Helical fits (globally fit for nucleotides shown with bracket) were performed on buffer and 20% PEG200 samples to obtain a  $T_M$  for unfolding of each stem in (A) D SL, (B) AC SL, and (C) TΨC SL. The fit  $T_M$ 's and the residuals of the fits are provided in each figure and in Table 1.



## 2.0 mM Mg<sup>2+</sup>

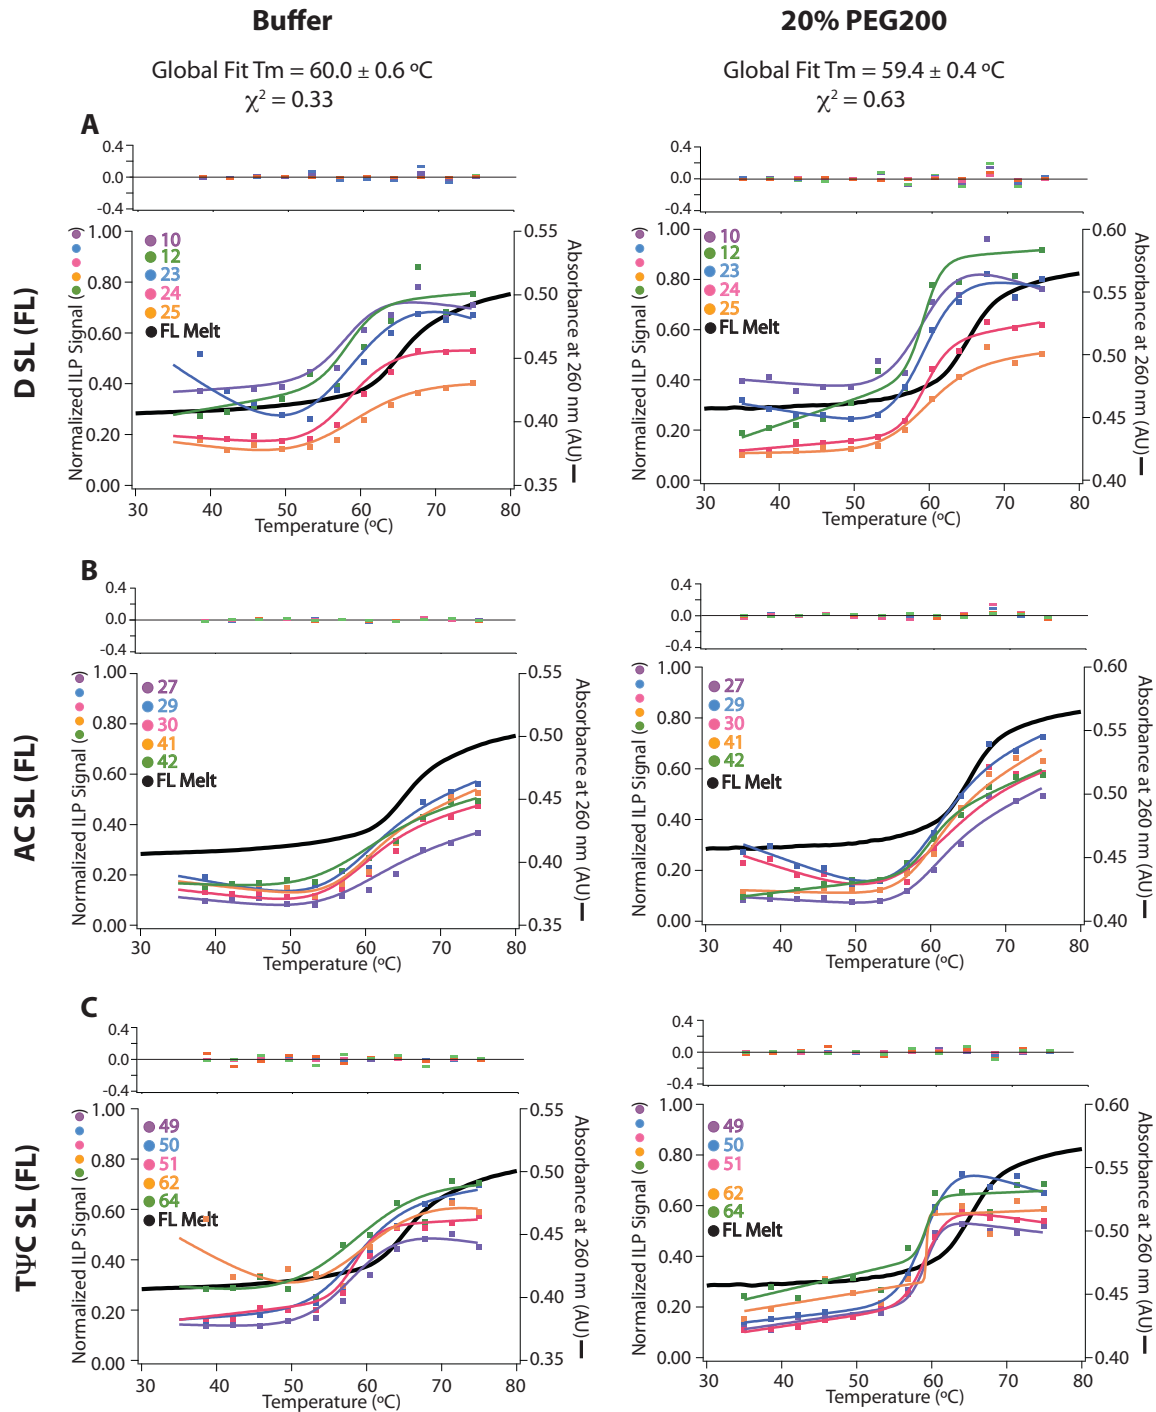

**Figure S6.** Global fitting of temperature-dependent ILP data in buffer and 20% PEG200 with 2.0 mM Mg<sup>2+</sup>. The same ILP data from Figure S5 were fit globally across each nucleotide in each stem for a single  $T_M$  of the RNA and to look for two-state behavior. The  $T_M$  values and the residuals from the fits are provided in each figure and in Table 1.

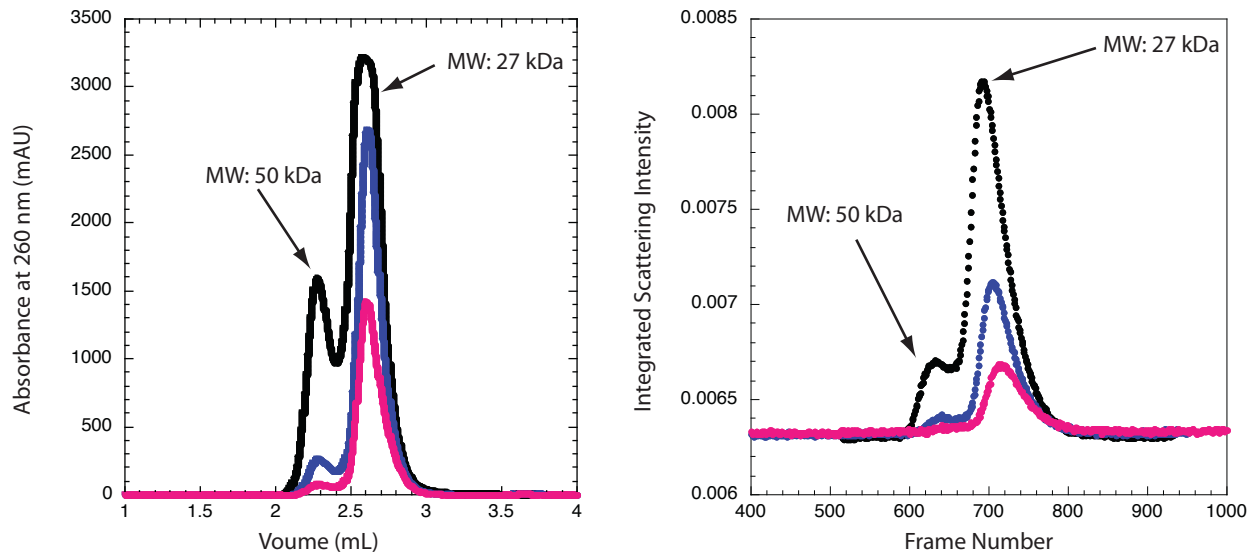

**Figure S7.** Uv-vis detection and scattering intensity of in-line SEC SAXS experiments of FL tRNA in buffer with 0.5 mM  $Mg^{2+}$ . (Left) Absorbance-detection at 260 nm and (Right) Integrated scattering intensity of size-exclusion traces of FL tRNA in buffer with 0.5 mM  $Mg^{2+}$  at 0.2 (pink), 0.4 (blue), and 0.6 mg/mL (black). The molecular weight of both peaks as determined from the integrated intensity in BioXTAS RAW is labeled. The left peak has a higher molecular weight (~50 kDa) and is attributed to the formation of a dimer, and the right peak has a lower molecular weight (~27 kDa) very close to that expected of the monomer (estimated 25 kDa). In the 0.2 mg/mL curves, trace amounts of the dimer peak are absorbance-detected, but are not scattering detected. The curves of 0.6 mg/mL RNA (black) were offset to align with the other curves; during the 0.6 mg/mL experiment a bubble was found in the SEC line and the beam had to be turned off, therefore the time of exposure and volume eluted was offset.

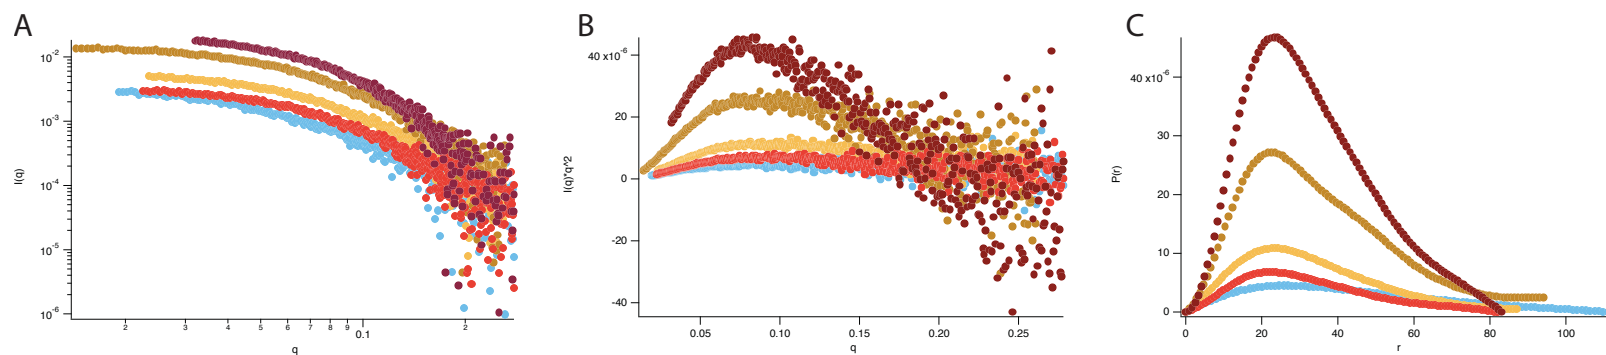

**Figure S8.** Small angle X-ray scattering data fitting of FL tRNA in buffer and 20% PEG8000 in the background of low, physiological  $Mg^{2+}$  and crowding. (A) Scattering curves, (B) Kratky plots, and (C)  $P(r)$  plots of FL tRNA in buffer with 0 (blue), 0.5 (light yellow), and 2.0 mM  $Mg^{2+}$  (red), and in 20% PEG8000 with 0.5 (dark yellow) and 2.0 mM  $Mg^{2+}$  (maroon). The data without PEG8000 were collected by SEC-SAXS with the 2.0 mM  $Mg^{2+}$  data collected on a different trip than the 0 and 0.5 mM  $Mg^{2+}$  data. The data in the presence of 20% PEG8000 were collected without SEC.

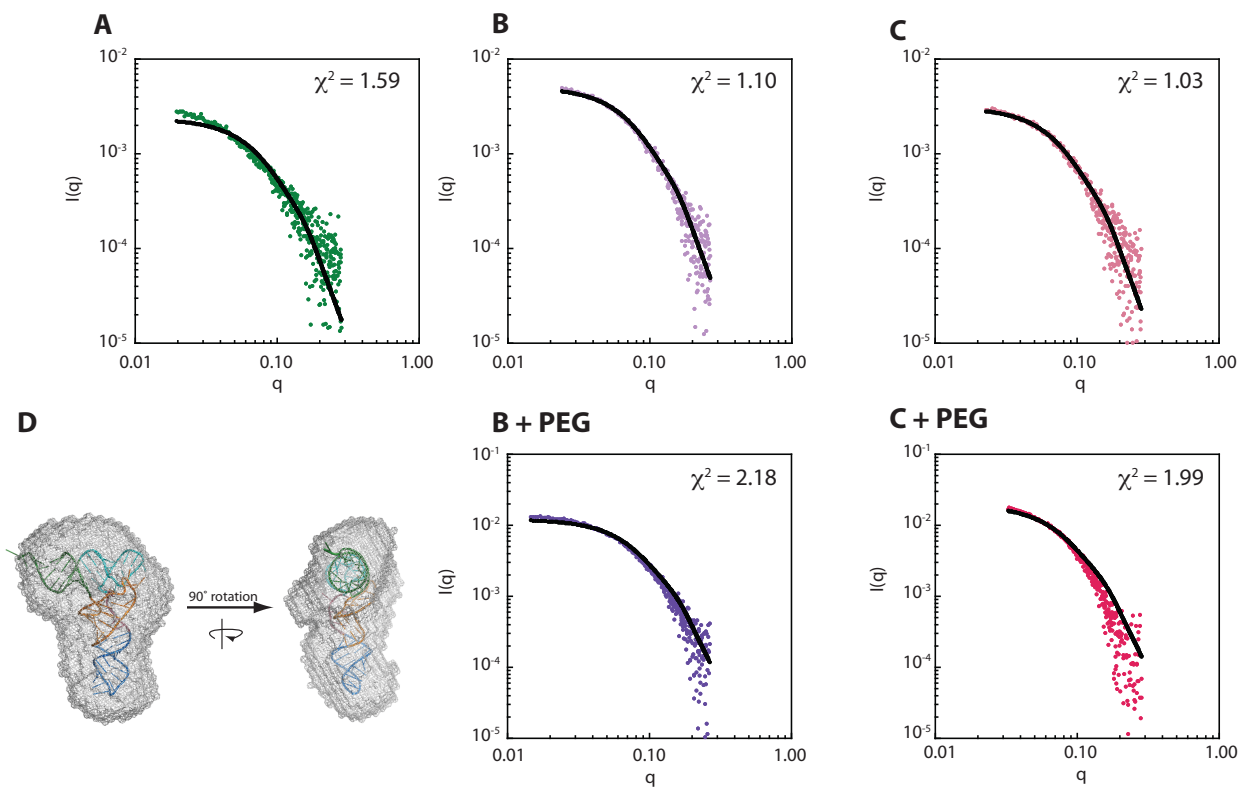

**Figure S9.** Comparison of experimental SAXS scattering curves and the theoretical scattering curve of a tRNA<sup>Phe</sup> crystal structure (PDB ID: 1ehz) generated with FoXS. (A-C) Overlay of experimental scattering curves with the theoretical tRNA<sup>Phe</sup> scattering curve generated with FoXS in (A) 0, (B) 0.5, and (C) 2.0 mM Mg<sup>2+</sup> with and without PEG8000. The  $\chi^2$  of the FoXS fits are provided on each plot. (D) DAMAVER bead model generated from the tRNA<sup>Phe</sup> theoretical scattering curve overlaid with the crystal structure.
